# Supplementary material for: Bone measurements interact with phenotypic measures in canine Duchenne muscular dystrophy
Source: Front Vet Sci. 2025 Jan 6;11:1339833. doi: 10.3389/fvets.2024.1339833 (PMC11744001; doi:10.3389/fvets.2024.1339833)
Supplement: Supplementary file 5 [file Table_1.xlsx]

## Sheet: Supplemental Table 1
	Normal	Carrier	Affected	P-value Normal*Affected	P-value Normal*Carrier	P-value Carrier*Affected
Absolute Femur Length (mm)	156.8 [146.3, 167.3]	151.1 [144.4, 157.9]	159.5 [152.9, 166.1]	0.9116	0.5326	0.2231
Absolute Max Cortical Thickness (mm)	8.2 [7.7, 8.7]	8.8 [8.3, 9.3]	8.3 [7.9, 8.8]	0.8905	0.1122	0.2395
Absolute Min Cortical Thickness (mm)	7.3 [6.9, 7.6]	7.8 [7.4, 8.2]	7.8 [7.3, 8.2]	0.061	0.0488	0.9922
Absolute Cortical Density (HU)	907.3 [886.4, 928.1]	950.2 [911.7, 988.6]	918.9 [851.6, 986.3]	0.8923	0.2448	0.458
Femur Length Normalized (mm/kg BW)	8.4 [7.0, 9.7]	6.7 [6.0, 7.4]	8.4 [6.7, 10.2]	0.9857	0.0872	0.0649
Max Cortical Thickness Normalized (mm/kg BW)	0.43 [0.37, 0.50]	0.39 [0.35, 0.43]	0.44 [0.34, 0.54]	0.9838	0.4893	0.3957
Min Cortical Thickness Normalized (mm/kg BW)	0.38 [0.33, 0.43]	0.34 [0.31, 0.39]	0.41 [0.32, 0.51]	0.7087	0.5225	0.17
Femur Length (mm) (ANCOVA)	157 [152.2, 162.5]	151.2 [145.2, 157.1]	159.5 [154.1, 165.0]	0.5683	0.1517	0.0722
Max Cortical Thickness (mm) (ANCOVA)	8.21 [7.9, 8.5]	8.97 [8.6, 9.3]	8.2 [7.9, 8.5]	0.944	0.0029	0.0053
Min Cortical Thickness (mm) (ANCOVA)	7.32 [7.1, 7.6]	7.88 [7.6, 8.2]	7.8 [7.5, 8.1]	0.0155	0.0127	0.703
Cortical Density (HU) (ANCOVA)	918.0 [889.2, 947.2]	947.9 [914.4, 981.6]	925.0 [894.3, 955.6]	0.7482	0.2213	0.3692
Femur Length Normalized (mm/kg BW) (ANCOVA)	7.9 [7.7, 8.2]	7.6 [7.3, 7.9]	8.1 [7.8, 8.3]	0.36	0.1533	0.0398
Max Cortical Thickness Normalized (mm/kg BW) (ANCOVA)	0.4 [0.4, 0.43]	0.45 [0.42, 0.47]	0.42 [0.4, 0.44]	0.5929	0.0221	0.0767
Min Cortical Thickness Normalized (mm/kg BW) (ANCOVA)	0.37 [0.35, 0.38]	0.39 [0.37, 0.41]	0.40 [0.38, 0.41]	0.0094	0.0398	0.7972
Table 1: Values were in mean [95%CI]. Ordinary two-way ANOVA performed on the predicted value after ANCOVA (interpolated data) on the values with covariants: genotype, weight, age and sex. Bolded text was for p < 0.05. P values were for group and interaction groups. Results were analyzed via multiple linear regression (⁎/+/^p < 0.05, ⁎⁎/++/^^p < 0.01, ⁎⁎⁎/+++/^^^p < 0.001).
