# Supplementary material for: Bone measurements interact with phenotypic measures in canine Duchenne muscular dystrophy
Source: Front Vet Sci. 2025 Jan 6;11:1339833. doi: 10.3389/fvets.2024.1339833 (PMC11744001; doi:10.3389/fvets.2024.1339833)
Supplement: Supplementary file 6 [file Table_2.xlsx]

## Sheet: Supplemental Table 2
	Normal	Carrier	Affected	P-value Normal*Affected	P-value Normal*Carrier	P-value Carrier*Affected
Hip Joint Angle-Rest	108.5 [95.1, 121.9]	118.3 [106.2, 130.5]	109.8 [103.1 116.6]	0.9742	0.2729	0.3709
Hip Joint Angle-Flex	38.8 [32.5, 45.1]	46.7 [38.4, 54.9]	42.8 [32.4, 53.2]	0.6742	0.2451	0.6957
Hip Joint Angle-Extension	167.7 [165.0, 170.4]	167.8 [165.4, 170.3]	160.3 [152, 168.5]	0.0503	0.9981	0.045
Pelvic Angle	41.7 [39.6, 43.7]	48.0 [40.5, 55.5]	47.8 [44.1, 51.5]	0.0938	0.084	0.998
Extension Torque	5.0 [3.2, 6.8]	7.2 [6.5, 7.9]	5.0 [3.2, 6.8]	0.15	0.4588	0.012
Flexor Torque	3.9 [3.2, 4.7]	3.8 [3.2, 4.3]	1.2 [1.0, 1.3]	<0.0001	0.814	<0.0001
Extension Force	2.7 [1.4, 3.9]	2.4 [2.0, 2.8]	2.1 [1.4, 2.8]	0.2126	0.6328	0.5535
Flexor Force	1.6 [1.2, 2.0]	1.2 [1.1, 1.5]	0.47 [0.32, 0.61]	<0.0001	0.0981	0.0002
CS Circumference	4.0 [3.2, 4.9]	2.7 [2.1, 3.4]	3.9 [1.8, 5.9]	0.9523	0.067	0.1731
Absolute RF Volume (mm^3)	20755 [18006, 23505]	26084 [22925, 29242]	18804 [11697, 25911]	0.7413	0.1383	0.0354
Absolute VL Volume (mm^3)	25698 [21180, 30216]	29708 [24853, 34563]	23884 [17998, 29769]	0.7984	0.3542	0.1304
Absolute CS Volume (mm^3)	12594 [9676, 15511]	14299 [10912, 17686]	21205 [15788, 26622]	0.0041	0.7298	0.019
Absolute RF Density (HU)	55.72 [53.4, 57.9]	50.45 [47.4, 53.5]	40.1 [35.8, 44.4]	<0.0001	0.0284	0.0001
Absolute VL Density (HU)	52.13 [48.2, 56.1]	46.8 [42.5, 51.2]	37.8 [30.8, 43.7]	0.0002	0.1691	0.0095
Absolute CS Density (HU)	53.1 [51.3, 54.9]	41.7 [30.8, 52.6]	31.1 [17.7, 44.5]	0.0032	0.1286	0.1684
%ECD	0.2 [0.1, 0.3]	0.2 [0.1, 0.3]	0.5 [0.4, 0.7]	0.0002	0.8765	0.0006
CS Circumference Normalized (mm/kg BW)	0.03 [0.02, 0.03]	0.02 [0.01, 0.02]	0.02 [0.01, 0.04]	0.9513	0.0992	0.2374
RF Muscle Volume Normalized (mm/kg BW)	132.7 [114.0, 151.4]	172.3 [156.4, 188.2]	117.2 [74.7, 159.7]	0.5913	0.0556	0.0079
VL Muscle Volume Normalized (mm/kg BW)	163.3 [141.5, 185.0]	196.5 [165.3, 227.7]	149.5 [114.5, 184.5]	0.6849	0.1402	0.0299
CS Muscle Volume Normalized (mm/kg BW)	80.5 [61.2, 99.8]	94.5 [72.9, 116.2]	133.0 [99.6, 166.5]	0.0053	0.5888	0.0383
Hip Joint Angle-Rest (ANCOVA)	112.8 [106.4, 119.3]	115.7 [108.3, 123.2]	108.1 [101.3, 114.8]	0.3046	0.5835	0.1765
Hip Joint Angle-Flex (ANCOVA)	40.7 [35.6, 45.8]	44.6 [38.7, 50.5]	42.9 [37.6, 48.4]	0.5424	0.3655	0.7219
Hip Joint Angle-Extension (ANCOVA)	166.5 [163.8, 169.2]	171.5 [168.4, 174.7]	157.7 [154.8, 160.6]	<0.0001	0.0336	<0.0001
Pelvic Angle (ANCOVA)	41.9 [38.8, 45.0]	48.2 [44.6, 51.0]	47.3 [44.1, 50.6]	0.0207	0.0191	0.7476
Extension Torque (ANCOVA)	6.8 [5.8, 7.8]	7.2 [6.5, 8.0]	4.7 [4.0, 5.3]	0.0006	0.5693	0.0002
Flexor Torque (ANCOVA)	4.05 [3.7, 4.4]	3.7 [3.3, 4.1]	1.1 [0.72, 1.4]	<0.0001	0.2524	<0.0001
Extension Force (ANCOVA)	2.5 [2.1, 2.9]	2.673 [2.3, 2.9]	1.7 [1.4, 1.9]	0.0007	0.7481	0.0005
Flexor Force (ANCOVA)	1.5 [1.4, 1.6]	1.3 [1.2, 1.5]	0.3 [0.225, 0.497]	<0.0001	0.1388	<0.0001
CS Circumference (ANCOVA)	4.1 [3.6, 4.6]	2.3 [1.7, 2.9]	4.5 [3.9, 5.2]	0.3376	0.0002	0.0003
RF Volume (ln) (ANCOVA)	9.9 [9.8, 10.1]	10.1 [10.0, 10.2]	9.7 [9.6, 9.8]	0.0146	0.1052	0.0008
VL Volume (ln) (ANCOVA)	10.1 [10.0, 10.3]	10.3 [10.2, 10.5]	10.0 [9.9, 10.2]	0.2539	0.1006	0.0158
CS Volume (ln) (ANCOVA)	9.5 [9.3, 9.6]	9.5 [9.4, 9.7]	9.9 [9.7, 10.0]	0.0007	0.4027	0.0267
RF Density (ln) (ANCOVA)	3.9 [3.9, 4.0]	3.9 [3.8, 3.9]	3.7 [3.6, 3.7]	<0.0001	<0.0001	0.0169
VL Density (ln) (ANCOVA)	3.9 [3.8, 4.0]	3.8 [3.7, 3.9]	3.6 [3.5,3.7]	<0.0001	0.1391	0.0026
CS Density (ln) (ANCOVA)	3.8 [3.6, 4.0]	3.8 [3.6, 4.0]	3.3 [3.1, 3.5]	0.0007	0.8667	0.0057
%ECD (ANCOVA)	0.21 [0.1, 0.2]	0.2 [0.1, 0.2]	0.48 [0.4, 0.5]	<0.0001	0.8107	<0.0001
CS Circumference Normalized (ANCOVA)	0.02 [0.02, 0.03]	0.02 [0.01, 0.02]	0.02 [0.02, 0.03]	0.2525	0.0002	0.0002
RF Muscle Volume Normalized (ln) (ANCOVA)	4.9 [4.8, 5.0]	5.1 [5.0, 5.3]	4.7 [4.5, 4.8]	0.007	0.0385	0.0001
VL Muscle Volume Normalized (ln) (ANCOVA)	5.1 [5.0, 5.2]	5.3 [5.2, 5.4]	5.0 [4.8, 5.1]	0.1405	0.0241	0.0015
CS Muscle Volume Normalized (ln) (ANCOVA)	4.4 [4.3, 4.6]	4.5 [4.4, 4.7]	4.8 [4.6, 4.9]	0.0009	0.2488	0.0629
Table 2: Absolute values were in mean [95%CI]. Absolute values were analyzed with one-way ANOVA. If data was not normally distributed, then it was log transformed (ln). Ordinary two-way ANOVA performed on the predicted value after ANCOVA on the values with covariants: genotype, weight, age and sex. Bolded text was for p < 0.05. P values were for group and interaction groups. Results were analyzed…
