# Supplementary material for: Bone measurements interact with phenotypic measures in canine Duchenne muscular dystrophy
Source: Front Vet Sci. 2025 Jan 6;11:1339833. doi: 10.3389/fvets.2024.1339833 (PMC11744001; doi:10.3389/fvets.2024.1339833)
Supplement: Supplementary file 7 [file Table_3.xlsx]

## Sheet: Supplemental Table 3 Correlatio
Affected dog correlations
	Femur Length		MAX Cort. Thick.		MIN Cort. Thick.		Cort. Den.(HU)		Rest-JA		Max-Flex-JA		Max Ext JA		Pelvic-Angle		Ext Tet		Flex Tet		%ECD		CS Circ.		RF MV		VL MV		CS MV		RF MD		VL MD		CS MD
	R-Correlation	P-Value	R-Correlation	P-Value	R-Correlation	P-Value	R-Correlation	P-Value	R-Correlation	P-Value	R-Correlation	P-Value	R-Correlation	P-Value	R-Correlation	P-Value	R-Correlation	P-Value	R-Correlation	P-Value	R-Correlation	P-Value	R-Correlation	P-Value	R-Correlation	P-Value	R-Correlation	P-Value	R-Correlation	P-Value	R-Correlation	P-Value	R-Correlation	P-Value	R-Correlation	P-Value
Femur Length	1		0.975363	6.85954e-08	0.979286	2.90059e-08	-0.592174	0.0424897	-0.768378	0.00350512	0.76709	0.0035952	0.169365	0.598737	-0.928012	1.34808e-05	-0.545201	0.162256	0.391033	0.208792	0.319423	0.311508	0.619982	0.101068	-0.745936	0.00534132	-0.498559	0.098981	0.246937	0.439079	0.295403	0.351243	0.482765	0.111898	0.776859	0.00295406
MAX Cort. Thick.	0.975363	6.85954e-08	1		0.986455	3.51055e-09	-0.502422	0.0959812	-0.826599	0.000915551	0.720288	0.00823873	0.305097	0.334894	-0.94451	3.77351e-06	-0.525049	0.181499	0.331017	0.293262	0.16345	0.611747	0.635515	0.0903742	-0.689625	0.0130853	-0.328574	0.297056	0.345082	0.271961	0.305629	0.33401	0.479924	0.114334	0.76741	0.0035727
MIN Cort. Thick.	0.979286	2.90059e-08	0.986455	3.51055e-09	1		-0.525982	0.0789997	-0.824031	0.000980883	0.704738	0.0104888	0.270744	0.394689	-0.92239	1.94457e-05	-0.635763	0.0902096	0.365238	0.243036	0.133072	0.680127	0.711853	0.0476304	-0.762982	0.00389427	-0.346033	0.270553	0.288395	0.363322	0.42286	0.170824	0.585667	0.0454049	0.782468	0.00262762
Cort. Den.(HU)	-0.592174	0.0424897	-0.502422	0.0959812	-0.525982	0.0789997	1		0.147989	0.646236	-0.890229	0.000104119	-0.179883	0.57587	0.669386	0.0172709	0.193983	0.645302	-0.152464	0.636184	-0.475437	0.118253	-0.28458	0.494521	0.379617	0.223562	0.521653	0.0819537	-0.0101971	0.974909	-0.23256	0.466997	-0.456778	0.135493	-0.547973	0.0651146
Carrier dog correlations
	Femur Length		MAX Cort. Thick.		MIN Cort. Thick.		Cort. Den.(HU)		Rest-JA		Max-Flex-JA		Max Ext JA		Pelvic-Angle		Ext Tet		Flex Tet		%ECD		CS Circ.		RF MV		VL MV		CS MV		RF MD		VL MD		CS MD
	R-Correlation	P-Value	R-Correlation	P-Value	R-Correlation	P-Value	R-Correlation	P-Value	R-Correlation	P-Value	R-Correlation	P-Value	R-Correlation	P-Value	R-Correlation	P-Value	R-Correlation	P-Value	R-Correlation	P-Value	R-Correlation	P-Value	R-Correlation	P-Value	R-Correlation	P-Value	R-Correlation	P-Value	R-Correlation	P-Value	R-Correlation	P-Value	R-Correlation	P-Value	R-Correlation	P-Value
Femur Length	1		0.69288	0.0124899	0.78229	0.00263751	-0.18907	0.556186	-0.164654	0.609092	-0.689889	0.0130362	0.0472756	0.884004	0.136495	0.672301	-0.258727	0.470423	0.222631	0.486748	-0.413855	0.181089	0.300233	0.343045	0.257891	0.277636	0.61272	0.132015	0.0370723	0.382721	0.539496	0.805914	0.912778	0.10052	0.908449	0.154144
MAX Cort. Thick.	0.69288	0.0124899	1		0.909184	4.17032e-05	0.177099	0.581889	0.0978962	0.762136	-0.574096	0.050932	0.143366	0.656678	0.282049	0.374443	0.121677	0.737738	-0.32235	0.306843	-0.616354	0.0328157	0.343212	0.27474	-0.341275	0.43131	0.460412	0.0222891	-0.27739	0.758824	-0.0795336	0.780264	0.496608	0.0175925	0.438251	0.0438294
MIN Cort. Thick.	0.78229	0.00263751	0.909184	4.17032e-05	1		0.259426	0.415499	0.262019	0.410682	-0.527402	0.0780476	0.119975	0.710343	0.479216	0.114947	0.212349	0.555871	-0.0902857	0.78021	-0.433156	0.159545	0.122191	0.705202	-0.251014	0.141221	0.649419	0.720187	-0.0992955	0.518653	0.0902631	0.778231	0.667987	0.982559	0.589146	0.85944
Cort. Den.(HU)	-0.18907	0.556186	0.177099	0.581889	0.259426	0.415499	1		0.54601	0.0662797	0.134997	0.675723	-0.464535	0.12814	0.710107	0.00966585	0.413327	0.235123	0.0786424	0.808053	0.0576805	0.85868	-0.660642	0.0193537	-0.450921	0.302498	0.115744	0.0470945	-0.20697	0.111053	-0.0911168	0.403005	-0.00708763	0.937025	-0.0573674	0.657911
Normal dog correlations
	Femur Length		MAX Cort. Thick.		MIN Cort. Thick.		Cort. Den.(HU)		Rest-JA		Max-Flex-JA		Max Ext JA		Pelvic-Angle		Ext Tet		Flex Tet		%ECD		CS Circ.		RF MV		VL MV		CS MV		RF MD		VL MD		CS MD
	R-Correlation	P-Value	R-Correlation	P-Value	R-Correlation	P-Value	R-Correlation	P-Value	R-Correlation	P-Value	R-Correlation	P-Value	R-Correlation	P-Value	R-Correlation	P-Value	R-Correlation	P-Value	R-Correlation	P-Value	R-Correlation	P-Value	R-Correlation	P-Value	R-Correlation	P-Value	R-Correlation	P-Value	R-Correlation	P-Value	R-Correlation	P-Value	R-Correlation	P-Value	R-Correlation	P-Value
Femur Length	1		0.791113	0.00217926	0.93333	9.26857e-06	0.0710885	0.826229	0.259718	0.414956	-0.804405	0.00160675	0.373072	0.232307	0.631682	0.0275706	-0.449181	0.371542	0.506344	0.0929979	0.711001	0.0095336	-0.50009	0.0977845	-0.351246	0.262915	-0.0820101	0.799977	-0.508239	0.0915796	0.0094876	0.976654	0.0870353	0.78796	0.262013	0.410695
MAX Cort. Thick.	0.791113	0.00217926	1		0.935223	8.0513e-06	-0.0736769	0.819992	0.303918	0.336861	-0.383582	0.218363	0.624123	0.0300751	0.760189	0.00410817	-0.369311	0.471218	0.164786	0.608799	0.675696	0.0158736	-0.819174	0.00111422	-0.0062716	0.984567	-0.374673	0.230148	-0.267862	0.399936	-0.569695	0.0531533	-0.437175	0.155274	-0.270705	0.394758
MIN Cort. Thick.	0.93333	9.26857e-06	0.935223	8.0513e-06	1		-0.0426208	0.895366	0.276234	0.384788	-0.648318	0.0225936	0.478339	0.115709	0.709255	0.00979312	-0.451352	0.368947	0.381027	0.221705	0.789836	0.00224149	-0.667103	0.0177982	-0.155619	0.629131	-0.296716	0.349005	-0.430127	0.162813	-0.327455	0.298802	-0.149705	0.642374	0.0182678	0.955064
Cort. Den.(HU)	0.0710885	0.826229	-0.0736769	0.819992	-0.0426208	0.895366	1		0.763016	0.00389174	0.0725149	0.822791	0.53219	0.0748924	0.513942	0.0873981	-0.638624	0.172293	0.538033	0.0711625	-0.432497	0.160252	0.0500221	0.877309	-0.178058	0.579812	0.847785	0.000495517	0.630701	0.0278866	0.306465	0.332621	0.148988	0.643988	0.463245	0.129344
Figure 4.Values are R2. Correlations were reported as Pearson R coefficients, and P values were adjusted for multiple testing. If the residuals were not normally distributed, data was log transformed. The dependent variable and confounders are indicated in the model. Cort. Thick= cortical thickness; Cort. Den=Cortical Density; HU=Hounsfeld units; Rest- JA=resting hip joint angle; Max flex JA=Maxi…
