# Supplementary material for: Bone measurements interact with phenotypic measures in canine Duchenne muscular dystrophy
Source: Front Vet Sci. 2025 Jan 6;11:1339833. doi: 10.3389/fvets.2024.1339833 (PMC11744001; doi:10.3389/fvets.2024.1339833)
Supplement: Supplementary file 8 [file Table_4.xlsx]

## Sheet: Supplemental Table 4 All Raw Da
Dog ID	Leg (Left, Right)	Sex	Genotype	weight (kg)	Age (m)	Femur length (mm)	Average Max Femur Diameter Thickness (mm)	Average Max Medulla Thickness (mm)	Max Cortical thickness (mm)	Average Min Femur Diameter Thickness (mm)	Average Min Medulla Thickness (mm)	Min Cortical thickness (mm)	Cortical Density Average (HU)	Rest. Joint Angle	Max. Flex. Joint Angle	Max. Ext. Joint Angle	Pelvic Angle	Ext Tet	Flex Tet	%ECD	CS Circumference	Muscle Volume (mm^3): RF	Muscle Volume (mm^3): VL	Muscle Volume (mm^3): CS	Muscle Density (HU): RF	Muscle Density (HU): VL	Muscle Density (HU): CS	Extension Force (Torque/(0.75*FL)/BW)	Flexor Force (Torque/(0.75*FL)/BW)
1	R	M	Normal	20	8	144.567	13.5433	5.812	7.73133	12.71	5.77267	6.93733	875.367	84	40	165	39	6.675	3.055	0.17	3.75	22055.1	20274.1	8887.8	54.9	50.1	51.5	2.5	1.14419
1	L	M	Normal	20	8	145.367	14.0267	5.83467	8.192	13.1	5.87833	7.22167	871.167	84	40	165	39	6.675	3.055	0.17	3.75	22055.1	20274.1	8887.8	54.9	50.1	51.5	2.5	1.14419
2	R	F	Affected	12.7	8	146.933	11.8867	3.95267	7.934	10.96	3.602	7.358	853.367	102	60	163	41	4.193	1.178	0.63	4.35	10817	18428	20512.9	41.9	42.4	46.3	2.47309	0.694801
2	L	F	Affected	12.7	8	147.433	11.4567	3.67167	7.785	10.5933	3.15367	7.43967	817.6	102	60	163	41	4.193	1.178	0.63	4.35	10817	18428	20512.9	41.9	42.4	46.3	2.47309	0.694801
3	R	F	Carrier	21.1	8	152.967	15.4233	7.05133	8.372	13.7867	6.46633	7.32033	914	96	40	167	36	6.355	3.718	0.14	3.9	28584.9	27240.5	12191	52.6	48.4	48.6	2.25607	1.31991
3	L	F	Carrier	21.1	8	154.433	15.43	6.84367	8.58633	13.9867	6.68267	7.304	905.5	96	40	167	36	6.355	3.718	0.14	3.9	28584.9	27240.5	12191	52.6	48.4	48.6	2.25607	1.31991
4	R	M	Affected	19.2	26	160.633	13.13	4.196	8.934	11.9	3.44567	8.45433	982	103	32	162	49	4.145	1.311	0.32	5.5	12108.8	26745.8	24905.2	44.8	42.5	38.3	1.61712	0.51147
4	L	M	Affected	19.2	26	167.333	13.3867	4.81033	8.57633	12.2067	3.68967	8.517	1006.17	103	32	162	49	4.145	1.311	0.32	5.5	12108.8	26745.8	24905.2	44.8	42.5	38.3	1.61712	0.51147
5	R	F	Carrier	22.2	26	150.267	14.7433	5.155	9.58833	12.9633	4.67233	8.291	1012.83	124	48	165	54		3.8	0.17	2.5	24312.7	30693	11216.7	50.7	47.9	44		1.28218
5	L	F	Carrier	22.2	26	154	14.5067	5.25933	9.24733	13.2767	4.63533	8.64133	1000.17	124	48	165	54		3.8	0.17	2.5	24312.7	30693	11216.7	50.7	47.9	44		1.28218
6	R	F	Carrier	25.9	70	145.867	14.1167	4.92667	9.19	12.44	4.73733	7.70267	931.233	117	49	168	45	7.363	3.018	0.21	2.6	22094.4	21594.9	11147	45.7	39	22.7	2.12948	0.872847
6	L	F	Carrier	25.9	70	142.867	14.4333	4.65333	9.78	12.63	4.34333	8.28667	987.7	117	49	168	45	7.363	3.018	0.21	2.6	22094.4	21594.9	11147	45.7	39	22.7	2.12948	0.872847
7	R	M	Affected	23.2	77	160.733	14.27	5.71367	8.55633	13.0067	5.15067	7.856	992.233	116	37	161	50		0.868	0.41	2.65	29077.4	32527.4	17783.2	38.6	33.5	11		0.280253
7	L	M	Affected	23.2	77	163.6	14.4367	5.59967	8.837	13.18	5.07367	8.10633	1005.63	116	37	161	50		0.868	0.41	2.65	29077.4	32527.4	17783.2	38.6	33.5	11		0.280253
8	R	M	Affected	19.9	77	162.8	13.2467	4.74433	8.50233	12.6367	4.94967	7.687	926.533	108	41	165	48	6.543	1.243	0.57	3	22471.3	22691.4	28616.2	33.5	28.3	35.8	2.46288	0.467882
8	L	M	Affected	19.9	77	158.2	13.43	5.17933	8.25067	12.4167	5.09767	7.319	963.9	108	41	165	48	6.543	1.243	0.57	3	22471.3	22691.4	28616.2	33.5	28.3	35.8	2.46288	0.467882
9	R	F	Affected	20.4	41	162.733	13.1	5.22933	7.87067	11.2433	3.945	7.29833	923.4	116	39	145	51	5.037	1.177	0.73		18333.7	17495.4	13968.6	38.4	34	21.3	1.84953	0.43218
9	L	F	Affected	20.4	41	159.933	13.3967	5.93967	7.457	10.8133	3.45533	7.358	935.567	116	39	145	51	5.037	1.177	0.73		18333.7	17495.4	13968.6	38.4	34	21.3	1.84953	0.43218
10	R	F	Carrier	23.8	41	163.2	14.6667	6.32867	8.338	13.9767	5.92067	8.056	967	120	45	166	53	7.012	4.467	0.27	2	29786.8	32891	17384.7	53.9	49.8	50	2.20691	1.40591
10	L	F	Carrier	23.8	41	159.967	15.3867	6.49133	8.89533	13.1067	5.37833	7.72833	975.067	120	45	166	53	7.012	4.467	0.27	2	29786.8	32891	17384.7	53.9	49.8	50	2.20691	1.40591
11	R	M	Affected	20.9	41	163.267	14.1633	5.92033	8.243	12.9	4.874	8.026	836.067	114	48	166	48		1.127	0.47		20016.7	25413.7	21444.3	43.3	42.8	33.9		0.403921
11	L	M	Affected	20.9	41	163.8	14.15	5.90567	8.24433	13.1633	5.242	7.92133	853.767	114	48	166	48		1.127	0.47		20016.7	25413.7	21444.3	43.3	42.8	33.9		0.403921
12	R	F	Carrier	23.4	76	147.6	14.8567	6.30833	8.54833	13.49	5.923	7.567	921.4	126	60	170	46	7.608	4.181	0.3	2.65	27619.3	31599.7	18486.3	50.9	45.6	37	2.43542	1.33839
12	L	F	Carrier	23.4	76	146.3	15.08	6.40467	8.67533	13.5633	5.80567	7.75767	955.433	126	60	170	46	7.608	4.181	0.3	2.65	27619.3	31599.7	18486.3	50.9	45.6	37	2.43542	1.33839
13	R	F	Carrier	19.7	26	146.9	13.9467	5.232	8.71467	12.6033	4.71267	7.89067	954.467	127	38	171	54	7.716	3.399	0.2	2.85	24103.3	34226.6	15366.9	48.9	50.2	47.7	2.9339	1.29242
13	L	F	Carrier	19.7	26	149.033	14.01	5.302	8.708	12.57	4.715	7.855	942.2	127	38	171	54	7.716	3.399	0.2	2.85	24103.3	34226.6	15366.9	48.9	50.2	47.7	2.9339	1.29242
14	R	M	Normal	16.9	9	147.7	13.3667	4.93	8.43667	11.7467	4.703	7.04367	903.067	113	43	168	42	7.288	3.214	0.25	3.5	17268.7	20926.9	12404.3	54.1	49.8	51.1	3.23028	1.42455
14	L	M	Normal	16.9	9	150.9	13.2067	4.78833	8.41833	11.5633	4.312	7.25133	896.6	113	43	168	42	7.288	3.214	0.25	3.5	17268.7	20926.9	12404.3	54.1	49.8	51.1	3.23028	1.42455
15	R	M	Normal	17.2	8	161.667	13.7433	4.78933	8.954	12.3667	4.78867	7.578	923.133	118	36	172	45	5.231	4.557	0.23	2.9	25022.9	26443.4	13389.1	52.9	48.1	52.8	2.27811	1.98458
15	L	M	Normal	17.2	8	160	13.4767	4.603	8.87367	12.18	4.406	7.774	920.533	118	36	172	45	5.231	4.557	0.23	2.9	25022.9	26443.4	13389.1	52.9	48.1	52.8	2.27811	1.98458
16	R	F	Normal	23.8	24	152.533	15.3133	6.87167	8.44167	14.0033	6.569	7.43433	930.1	117	48	168	41		3.797	0.002	4.6	20793.2	29020.7	17187.3	56.6	52.2	53.3		1.19504
16	L	F	Normal	23.8	24	153.167	15.48	7.06767	8.41233	14.0233	6.65867	7.36467	946.267	117	48	168	41		3.797	0.002	4.6	20793.2	29020.7	17187.3	56.6	52.2	53.3		1.19504
17	R	M	Normal	17.5	9	169.033	14.7833	7.01367	7.76967	13.6733	6.603	7.07033	915.067	106	32	168	42		4.263	0.16	4.25	19594.3	31010.4	10840	58.8	54	54.4		1.82472
17	L	M	Normal	17.5	9	168.567	14.8133	7.13567	7.67767	13.7667	6.44833	7.31833	933	106	32	168	42		4.263	0.16	4.25	19594.3	31010.4	10840	58.8	54	54.4		1.82472
18	R	F	Normal	19	44	165.367	16.51	8.53967	7.97033	14.06	6.542	7.518	897	113	34	165	41		4.803	0.29	5.3	19798.5	26511.9	12852.9	57	58.6	55.6		1.89355
18	L	F	Normal	19	44	167.9	16.4633	8.54833	7.915	14.17	6.54333	7.62667	919.467	113	34	165	41		4.803	0.29	5.3	19798.5	26511.9	12852.9	57	58.6	55.6		1.89355
